# Supplementary material for: Mechanical behavior of poly(methyl methacrylate)-based ionogels
Source: Royal Society of Chemistry journal article supplement (doi:10.1039/c4sm01466a), 2014-01-01
Supplement: c4sm01466a1.pdf [file c4sm01466a1.pdf]

### Supplementary information

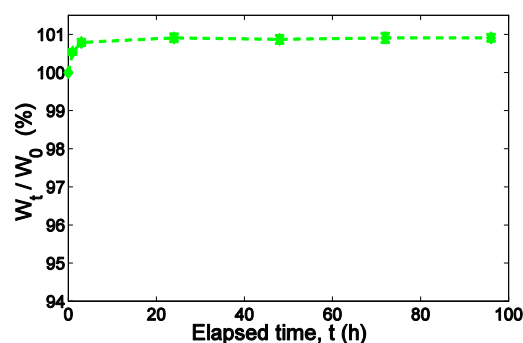

Fig. S1. Mass change of a 0.5 mm thick sheet of ionogel exposed to a relative humidity of 71% at 21°C.

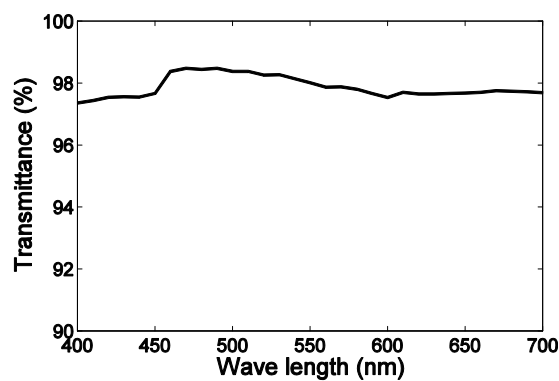

Fig. S2. Transmittance of ionogel.

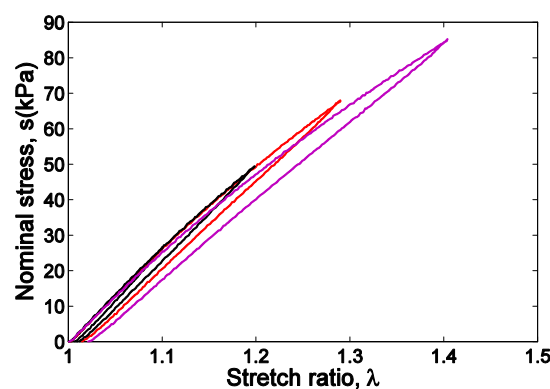

Fig.S3. Loading-unloading curve of ionogel with 0.2% MBAA at different stretch ratios.
